# Supplementary material
Source: Preprints.org preprint supplement (doi:10.20944/preprints202104.0285.v1)
Supplement: Supplementary file 2 [file supplementary]

**In vitro and In vivo Activity of 14-O-[(4,6-Diamino-pyrimidine-2-yl) thioacetyl] mutilin Against Methicillin-Resistant *Staphylococcus aureus***

Yunxing Fu1, 2, Chunqing Leng3, Yuan Fan4, Xia Ma1, Xianghui Li1, Xuefei Wang1, Zhenghuan Guo1,

Xiujun Wang1*, Ruofeng Shang4*

*1Zhengzhou Key Laboratory of Immunopharmacology of effective components of Chinese Veterinary Medicine, College of Veterinary Medicine, Henan University of Animal Husbandry and Economy, 450046 Zhengzhou, PR China*

*2Henan Provincial Research Center for the inheritance and innovation of Chinese veterinary medicine classic prescriptions, College of Veterinary Medicine, Henan University of Animal Husbandry and Economy, 450046 Zhengzhou, PR China*

*3Department of Animal Production, Jinhua Polytechnic, 321000, Jinhua, PR China.*

*4Key Laboratory of Veterinary Pharmaceutical Development, Ministry of Agriculture and Rural Affairs, Lanzhou Institute of Husbandry and Pharmaceutical Sciences of CAAS, 730050 Lanzhou, PR China*

***1 Address correspondence to** Xiujun Wang: wxjfly@126.com. Address: Henan University of Animal Husbandry and Economy, No. 6, Longzi North Road, Zhengdong New District, Zhengzhou, 450046, P.R. China.

***2 Address correspondence to** Ruofeng Shang**:** [shangrf1974@163.com](mailto:yiyp2013@163.com). Address: Lanzhou Institute of Husbandry and Pharmaceutical Sciences of CAAS, No. 335, Qilihe District, Lanzhou, 730050, P.R. China.

**Supplemental Data**

**Table of Contents**

Figure S1. IR, 1H-NMR and 13C-NMR Spectra of DPTM…………………………………………………………1-3

Table S1. MIC values of DPTM and Tiamulin fumarate against clinical isolates of MRSA…………………………4

**Figure S1.** IR, 1H-NMR and 13C-NMR Spectra of DPTM


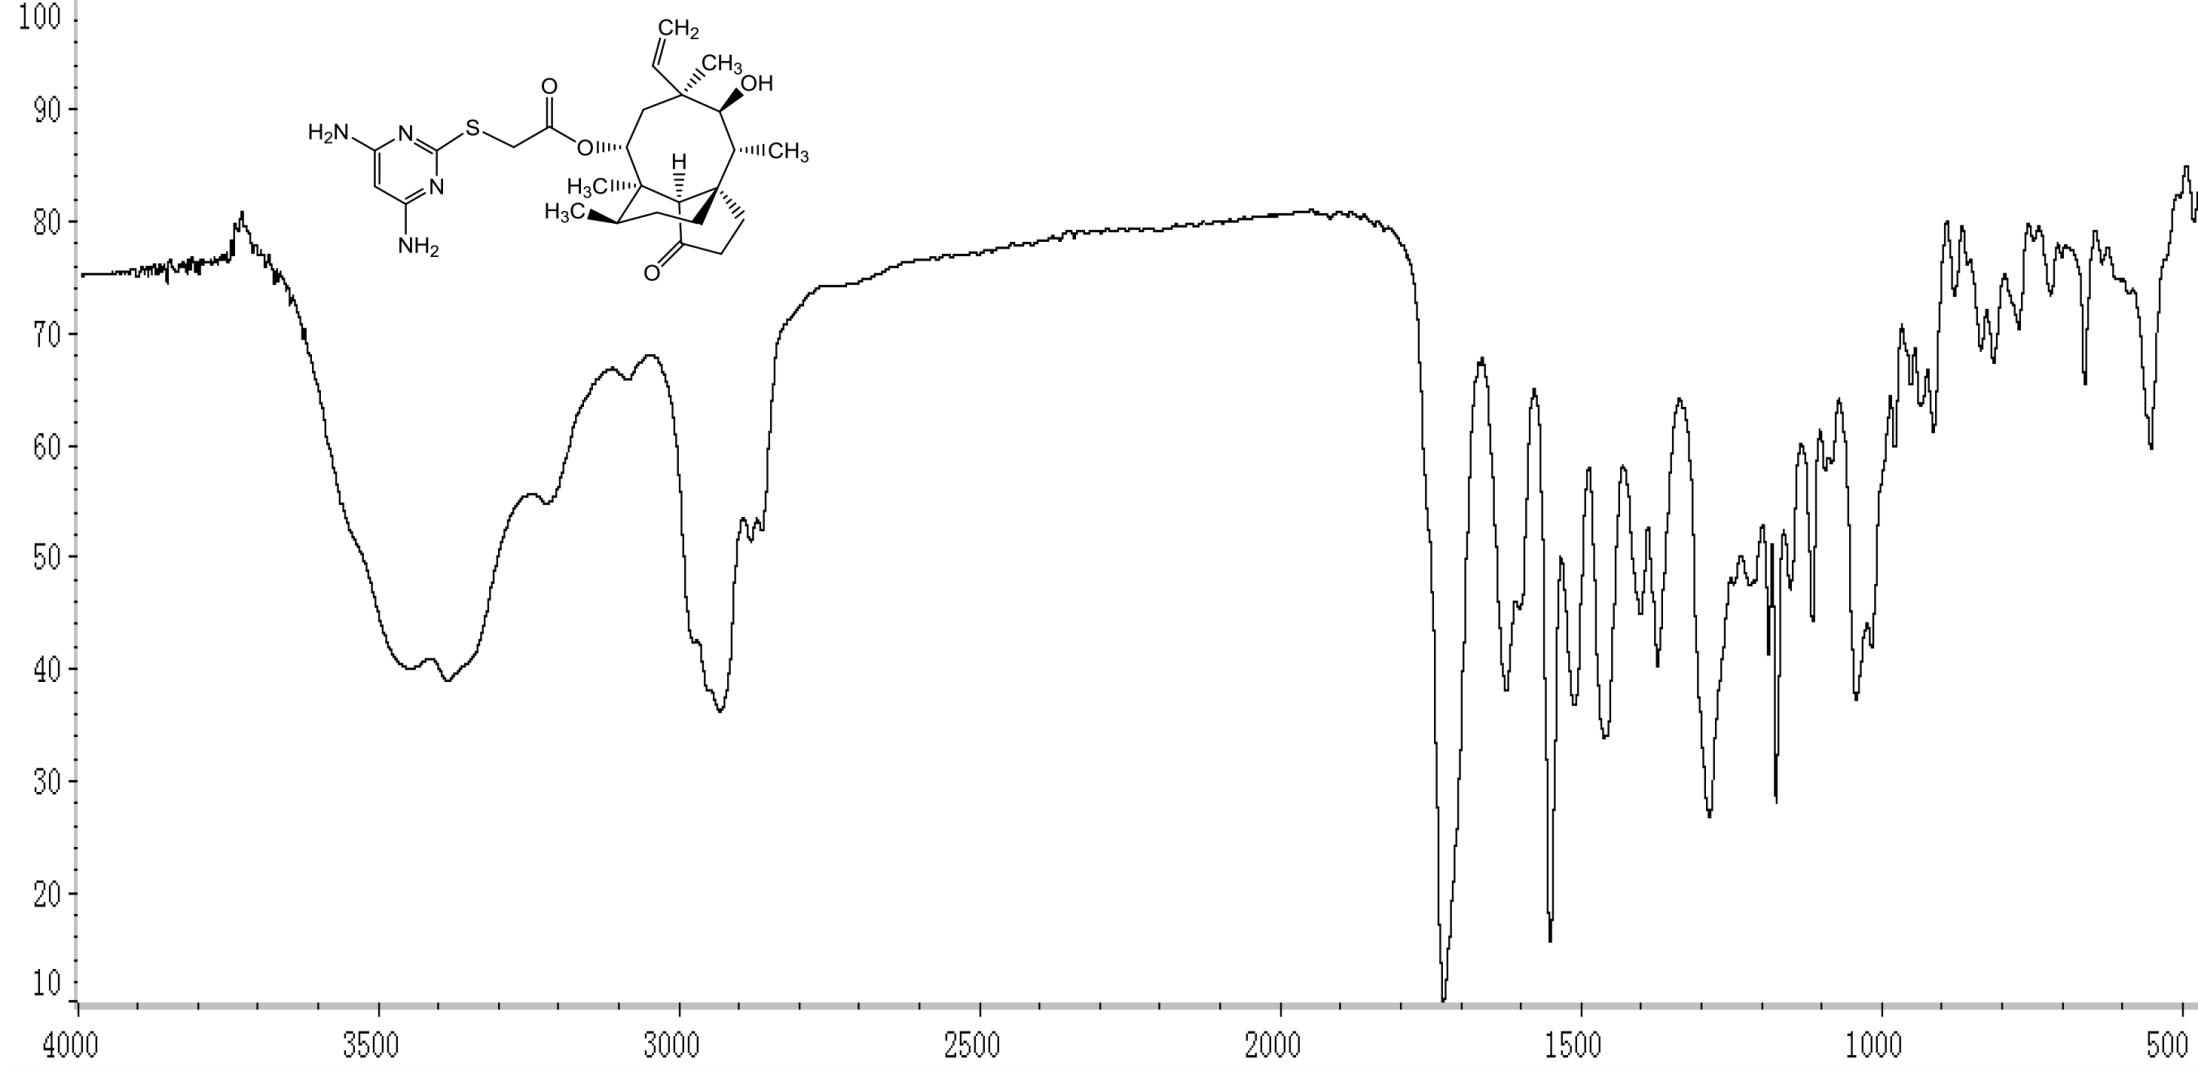

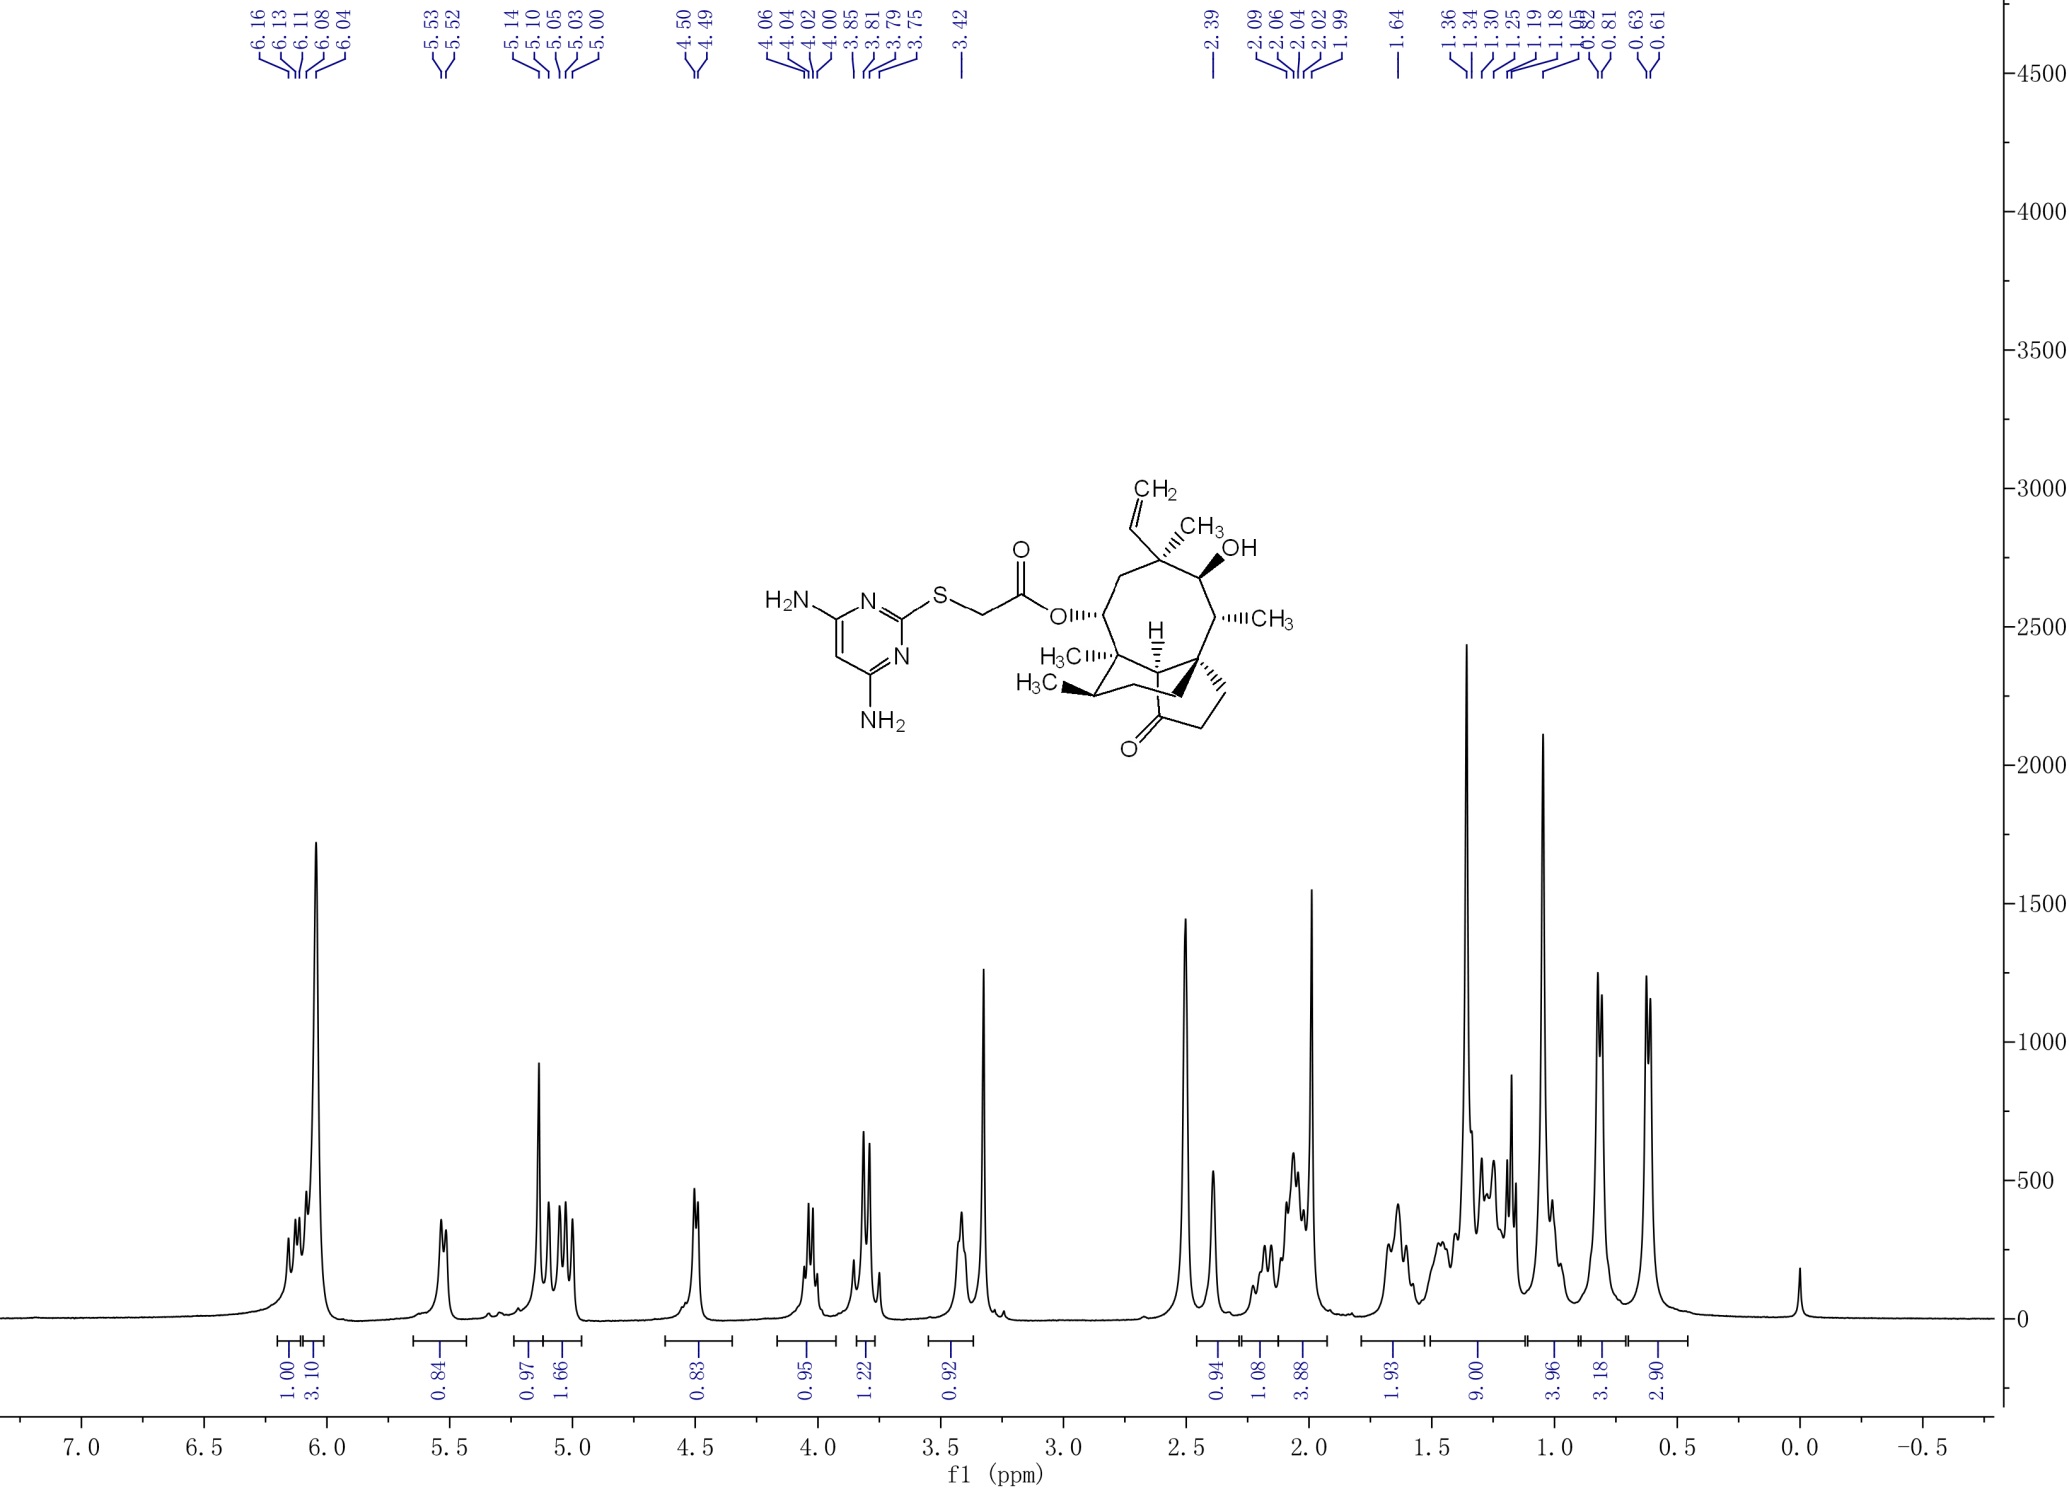


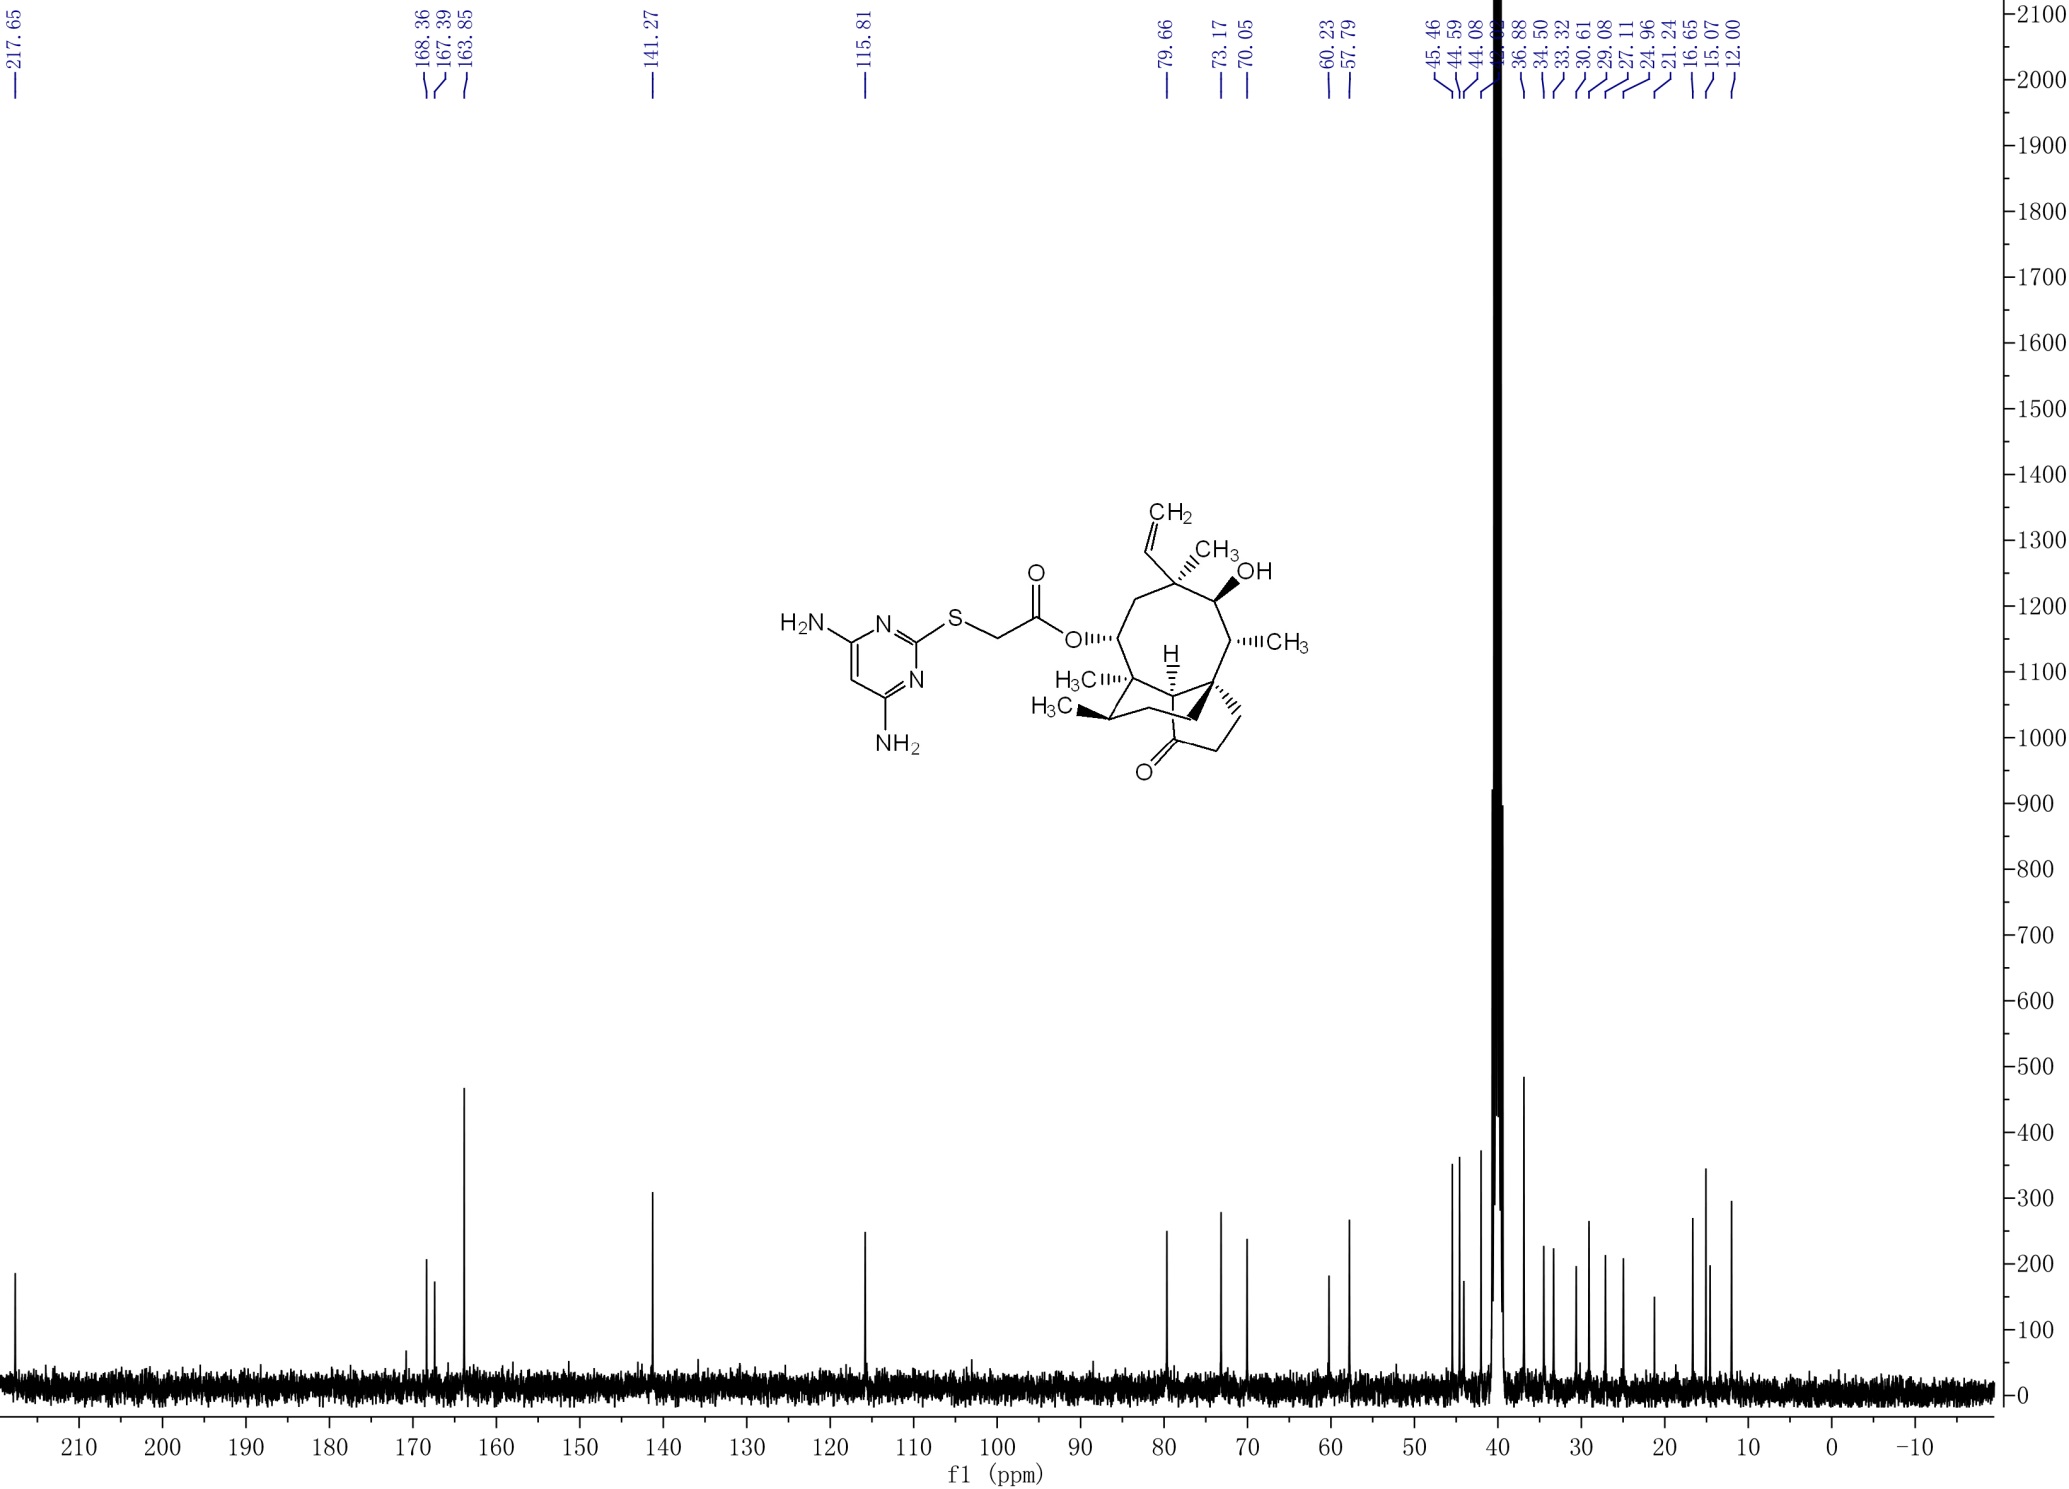


Table S1. MIC values of DPTM and Tiamulin fumarate against MRSA strains.

| Staina | SCCmecb | MIC (μg/mL) | | Staina | SCCmecb | MIC (μg/mL) | |
| --- | --- | --- | --- | --- | --- | --- | --- |
| DPTM | Tiamulin | DPTM | Tiamulin |
| MRSA-21  MRSA-23  MRSA-24  MRSA-32  MRSA-33  MRSA-38  MRSA-39  MRSA-40  MRSA-44  MRSA-45  MRSA-47  MRSA-48  MRSA-51  MRSA-53  MRSA-54  MRSA-55  MRSA-57  MRSA-59  MRSA-60  MRSA-61  MRSA-64  MRSA-67  MRSA-68  MRSA-70  MRSA-71  MRSA-72  MRSA-73 | III  III  IV  IV  IV  I  II  I  I  II  III  II  II  II  IV  IV  IV  III  III  I  IV  III  III  IV  III  III  II | 0.0625  0.0625  0.125  0.125  0.0625  0.0625  0.25  0.0625  0.0625  0.313  0.125  0.125  0.25  0.0625  0.0625  0.125  0.0625  0.0625  0.0313  0.0625  0.0625  0.0625  0.125  0.25  0.0625  0.0625  0.125 | 0.25  0.125  0. 5  0.25  0.125  0.125  1  0.125  0.25  0.125  0.5  0.25  1  0.25  0.5  0.25  0.125  0.25  0.125  0.5  0.125  0.25  0.25  0.5  0.125  0.25  0.125 | MRSA-75  MRSA-79  MRSA-85  MRSA-90  MRSA-94  MRSA-99  MRSA-108  MRSA-122  MRSA-128  MRSA-133  MRSA-135  MRSA-141  MRSA-147  MRSA-149  MRSA-153  MRSA-155  MRSA-157  MRSA-159  MRSA-160  MRSA-166  MRSA-173  MRSA-177  MRSA-180  MRSA-185  MRSA-188  MRSA-194  MRSA-197 | II  II  II  IV  III  III  II  I  IV  IV  III  III  II  III  III  III  IV  II  IV  IV  II  III  III  II  IV  IV  III | 0.25  0.0625  0.0625  0.125  0.0313  0.0625  0.0625  0.0625  0.0313  0.125  0.25  0.125  0.0625  0.125  0.0625  0.0625  0.0625  0.0625  0.0625  0.0625  0.125  0.125  0.25  0.0625  0.125  0.0625  0.125 | 0.5  0.125  0.25  0.25  0.125  0.125  0.25  0.25  0.125  0.25  0.5  0.25  0.125  0.5  0.5  0.25  0.25  0.5  0.5  0.25  0.25  0.5  1  0.125  0.125  0.125  0.5 |

aStrains were collected from dairy farms located in Gansu province, China.

bStaphylococcal cassette chromosome mec types.
